# Supplementary material for: Effects of exogenous calcium on the drought response of the tea plant (Camellia sinensis (L.) Kuntze)
Source: PeerJ. 2022 Aug 29;10:e13997. doi: 10.7717/peerj.13997 (PMC9435517; doi:10.7717/peerj.13997)
Supplement: Supplemental Information 1 [file peerj-10-13997-s001.xlsx]

## Sheet: full table
ABBREVIATION CS	gene ID	Primer F 5' - 3'	Primer R 5' - 3'	Amplicon size, bp	Reference
Actin	LOC114316878	CCATCACCAGAATCCAAGAC	GAACCCGAAGGCGAATAGG	144	Hao et al., 2014
ADC	LOC114303664	ACTCTTGTCCTGCTTCTTACATCTTG	GTTTTAGTGGTTCGTTTGTCGTGG	121	Li et al. 2015
Anase	LOC114299229	TCTCTCGTAACCTATGCTTCCATC	GAAAAATATCACCTACATTAGCTCCTT	109	Li et al. 2015
ANR	LOC114259095	GGTGTAGCGACATGGAAGACC	CCGAGACCCAGACAATCAGAAA	150	Li et al. 2015
BMY	LOC114275395	CTCTACAAAGCCACCGACAA	AACCACCTTAGCAGCCATAAT	156	Yue et al., 2015
bHLH102	LOC114278396	AGGCTCGACACAGACAATTC	GACGATGACGACGATGATGAA	161	Samarina et al. 2020
CAU1	LOC114293321	GCTTTCAACAGGACCCGATAA	CCGTTTGAAGGGTTGAAGGA	138	Samarina et al. 2020
CBF1	LOC114290084	AGAAATCGGATGGCTTGTGT	TTGTCGTCTCAGTCGCAGTT	235	Ban et al., 2017
CHI	LOC114292457	TCTATTCTTTTTACCCAATCACCCC	TTGTTCTCTATCACCACAGTCCCG	98	Li et al. 2015
CHS	LOC114270235	TTGGAACTCTTTGTTTTGGATTGC	CGTGGCCCGTAGCTTCTCTT	100	Li et al. 2015
DFR	LOC114263316	ACCAACAACCCGTTTTCGACG	TCCCATGCTGCTTTCTCTGCC	118	Li et al. 2015
DHN1	LOC114315236	ACACCGATGAGGTGGAGGTA	AATCCTCGAACTTGGGCTCT	150	Ban et al., 2017
DHN2	LOC114263304	ACTTATGGCACCGGCACTAC	CTTCCTCCTCCCTCCTTGAC	186	Ban et al., 2017
DHN3	LOC114300050	TCCACATCGGAGGCCAAAAG	AACCCTCCTTCCTTGTGCTC	172	Ban et al., 2017
DREB26	LOC114286205	CCAGAGCCAAACAAAGCAATAC	GGGTGGAATAAGAGCCTAACC	151	Samarina et al. 2020
F3H	LOC114306386	GAGCTTTTGTTGTTAATCTGGGTG	ATTGATAGTCGGCTGCAGTTGGAG	109	Li et al. 2015
F3'H	LOC114310487	CGTTCAGTAGTTGCCCTAGGTTC	TCCGACAGGAGGAGATAGCGAT	87	Li et al. 2015
FLSa	LOC114314253	AGCTTAAAGAACTCCTCCCCAAC	GTGATCTCCCTCTCTCAACCACAC	149	Samarina et al. 2020
FLSb	LOC114257498	CAAGACAATGAAACGAGTGAGTGA	CACCAAAATACAAGACCAAGAAGTACG	114	Samarina et al. 2020
GLS	LOC114272685	AACAGCTATCTCCATTCTCTCTCG	CACGGTTTTGATTCACATTTCGTC	118	Li et al. 2015
GOLS1	LOC114315540	GGTTGAGGAAGGTGAAGAGTG	CTGGTTCTCAGGTGGGTAAAC	137	Samarina et al. 2020
GOLS3	LOC114300125	TGCTGGCATGTTTGTATTTGAG	TGGTGGGATAGGCTTGTAAAC	142	Samarina et al. 2020
GR-RBP3	LOC114262906	CGTACAGTGAGGGTGAACTATG	CCCAATCCTGTACTTCCATCAA	164	Samarina et al. 2020
GS	LOC114256340	GTGGAAGGTGTGGAGGTAGTAGACG	AAGCATTGGAGGAAAGGAAGAGTG	80	Li et al. 2015
Hydrolase22	LOC114314447	GGAACAACCCATGATGAGATAGA	AGTGTGGAAATCGGCAGTAG	150	Samarina et al. 2020
IMPDH	LOC114278007	AGGTTGAGGTTGCGGGTGAGT	GCATCTATGGCCGGAATAGAAGAAG	161	Li et al. 2015
LDOX	LOC114274940	CATTCATTCATTTCCCTCCAAGC	ATCATTCTGCAGCCACTCCCG	133	Li et al. 2015
LOX6	LOC114301806	GACCCAAGCCTCACAAATAG	GCTTCATTTATGCTACTCACAC	130	Zhu et al., 2018
NAC26	LOC114260089	ACAAACTACGCCACAATGC	AGGGAGGGTTCTTTTCAGG	168	Wang et al., 2016a
RHL41	LOC114294367	AACTGCTTGATGCTCCTCTC	AAGGTCTCCTCCTCCCATTA	165	Samarina et al. 2020
RS1	LOC114309726	GACAAACAACCACAGCCGTC	TGTTCTCGATCCCCTTCCCT	109	Yue et al., 2015
RS2	LOC114320502	CGGTTTGGCGCTTACTCTTC	TCTCCTCTTCTGCAACCGGA	124	Yue et al., 2015
SnRK1.1	LOC114269929	GTTCAAAACTCATCTTCCTCGCT	ATGGTTCTTGTCCAATCCCATCT	121	Yue et al., 2015
SnRK1.2	LOC114283882	TCTGCTGCTTTAGCTGTGGG	GCTCGAGACTGTAGGCCAAG	116	Yue et al., 2015
SnRK1.3	LOC114271874	TTGGAGTTGCGGTGTCACTT	CGGGCACCATGAGACAACT	135	Yue et al., 2015
SWEET2	LOC114316353	CGCCCATACCCACATTCAGG	CCAATCGAGTTGACTGTGGCA	163	Yue et al., 2015
TS	LOC114285352	TGCTTGTGAGTCCTTTTGGTGC	TTTCGTGTTATGTGATGGGAGTACC	129	Li et al. 2015
TPS11	LOC114302367	TCAGGGTTGTTGCTTTGGGT	TTGTCAGCAGAACCCTGTGG	136	Yue et al., 2015
WRKY2	LOC114291771	GAGACAGAAATGAGCAGGGAAAA	TGTATCGGTGTCAGTTGGGTA	83	Wang et al., 2016b
WRKY42	LOC114316921	CCACAGCAGCAAGTGTAAATG	CAAACCTGCTACAGTGAGAGAA	153	Samarina et al. 2020
